# Supplementary material for: In Vivo and In Vitro Protein Ligation by Naturally Occurring and Engineered Split DnaE Inteins
Source: PubMed Central journal article supplement (PMC2664965; doi:10.1371/journal.pone.0005185), 2009-04-13
Supplement: pone.0005185.s002.pdf [file pone.0005185.s002.pdf]

# Supplementary Figure 1

The summary of the constructs for the newly engineered split *SspDnaE* inteins

## (a) Int<sub>N</sub> constructs

|                                     |             |                                       |     |                                     |                                     |
|-------------------------------------|-------------|---------------------------------------|-----|-------------------------------------|-------------------------------------|
| <i>SspDnaE</i> -Int <sub>N157</sub> | (PTTDuet19) | H <sub>6</sub> -GB1 or H <sub>6</sub> | -GS | <i>SspDnaE</i> <sub>N</sub> (1-123) | -MVKVIGRRSLGVQRIFDIGLPQDHNFLLANGAIA |
| <i>SspDnaE</i> -Int <sub>N154</sub> | (pSZDuet03) | H <sub>6</sub> -GB1 or H <sub>6</sub> | -GS | <i>SspDnaE</i> <sub>N</sub> (1-123) | -MVKVIGRRSLGVQRIFDIGLPQDHNFLLANG    |
| <i>SspDnaE</i> -Int <sub>N151</sub> | (PTTDuet18) | H <sub>6</sub> -GB1 or H <sub>6</sub> | -GS | <i>SspDnaE</i> <sub>N</sub> (1-123) | -MVKVIGRRSLGVQRIFDIGLPQDHNFL        |
| <i>SspDnaE</i> -Int <sub>N144</sub> | (PTTDuet17) | H <sub>6</sub> -GB1 or H <sub>6</sub> | -GS | <i>SspDnaE</i> <sub>N</sub> (1-123) | -MVKVIGRRSLGVQRIFDIGLP              |
| <i>SspDnaE</i> -Int <sub>N137</sub> | (PTTDuet15) | H <sub>6</sub> -GB1 or H <sub>6</sub> | -GS | <i>SspDnaE</i> <sub>N</sub> (1-123) | -MVKVIGRRSLGVQR                     |
| <i>SspDnaE</i> -Int <sub>N130</sub> | (PTTDuet05) | H <sub>6</sub> -GB1 or H <sub>6</sub> | -GS | <i>SspDnaE</i> <sub>N</sub> (1-123) | -MVKVIGR                            |
| <i>SspDnaE</i> -Int <sub>N123</sub> | (PTTDuet02) | H <sub>6</sub> -GB1 or H <sub>6</sub> | -GS | <i>SspDnaE</i> <sub>N</sub> (1-123) |                                     |

## (b) Int<sub>C</sub> constructs

|                                    |            |  |  |                                             |     |
|------------------------------------|------------|--|--|---------------------------------------------|-----|
| <i>SspDnaE</i> -Int <sub>C3</sub>  | (pSZBAD09) |  |  | MANCFNKGT-                                  | CBD |
| <i>SspDnaE</i> -Int <sub>C6</sub>  | (pSZBAD10) |  |  | MAIAANCFNKGT-                               | CBD |
| <i>SspDnaE</i> -Int <sub>C9</sub>  | (pSZBAD08) |  |  | MANGAIAANCFNKGT-                            | CBD |
| <i>SspDnaE</i> -Int <sub>C16</sub> | (pSZBAD07) |  |  | MQDHNFLLANGAIAANCFNKGT-                     | CBD |
| <i>SspDnaE</i> -Int <sub>C23</sub> | (pSZBAD06) |  |  | MIFDIGLPQDHNFLLANGAIAANCFNKGT-              | CBD |
| <i>SspDnaE</i> -Int <sub>C30</sub> | (pSZBAD05) |  |  | MRS LGVQRIFDIGLPQDHNFLLANGAIAANCFNKGT-      | CBD |
| <i>SspDnaE</i> -Int <sub>C36</sub> | (pSZBAD01) |  |  | MVKVIGRRSLGVQRIFDIGLPQDHNFLLANGAIAANCFNKGT- | CBD |
