# Supplementary material for: In Vivo and In Vitro Protein Ligation by Naturally Occurring and Engineered Split DnaE Inteins
Source: PubMed Central journal article supplement (PMC2664965; doi:10.1371/journal.pone.0005185), 2009-04-13
Supplement: pone.0005185.s003.pdf [file pone.0005185.s003.pdf]

# Supplementary Figure 2

The mass spectrum of the elution fraction from *In vivo* ligation of GB1 and CBD by *SspDnaE* intein.

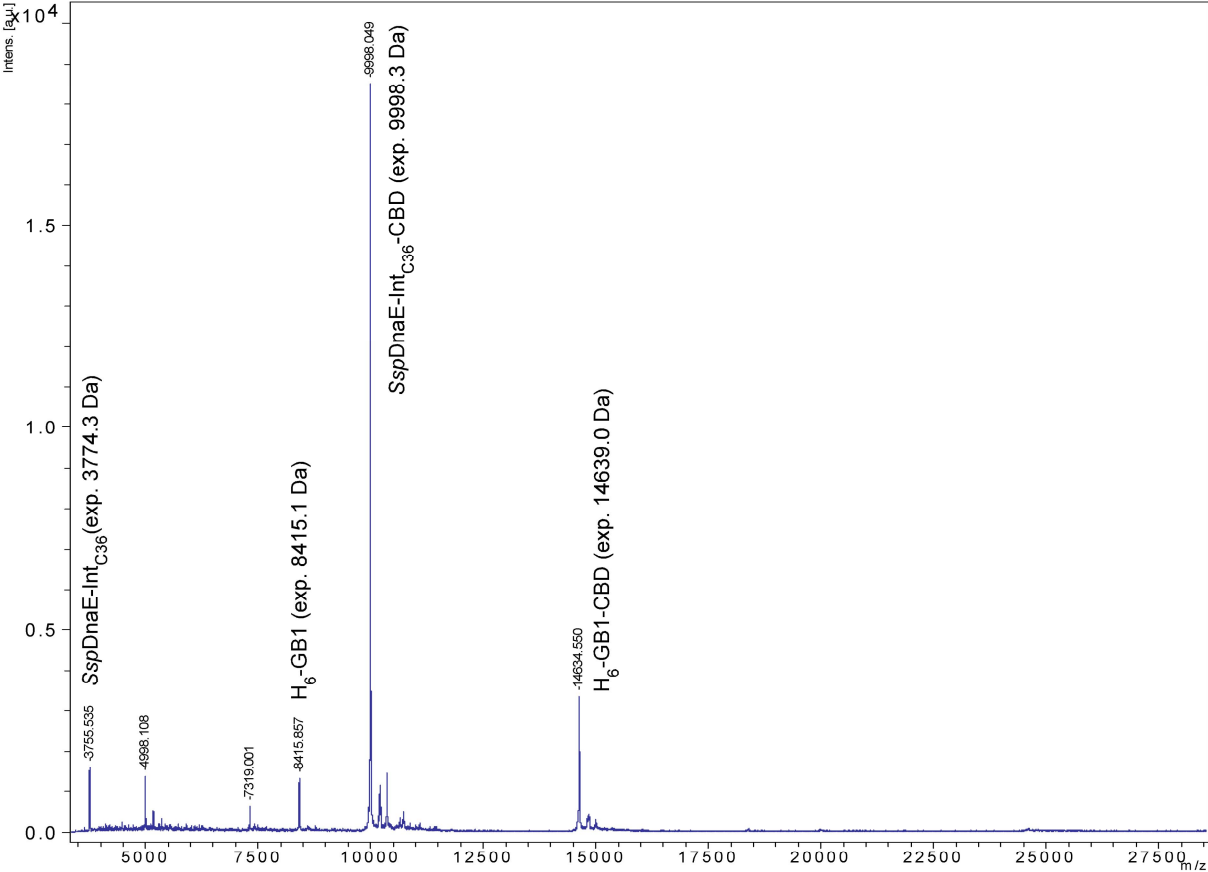

Supplemental Fig.2
