# Supplementary material for: In Vivo and In Vitro Protein Ligation by Naturally Occurring and Engineered Split DnaE Inteins
Source: PubMed Central journal article supplement (PMC2664965; doi:10.1371/journal.pone.0005185), 2009-04-13

# Supplementary Figure 3

The mass spectrum of the ligated product, H<sub>6</sub>-GB1-GB1 by the newly engineered *Npu*DnaE intein.

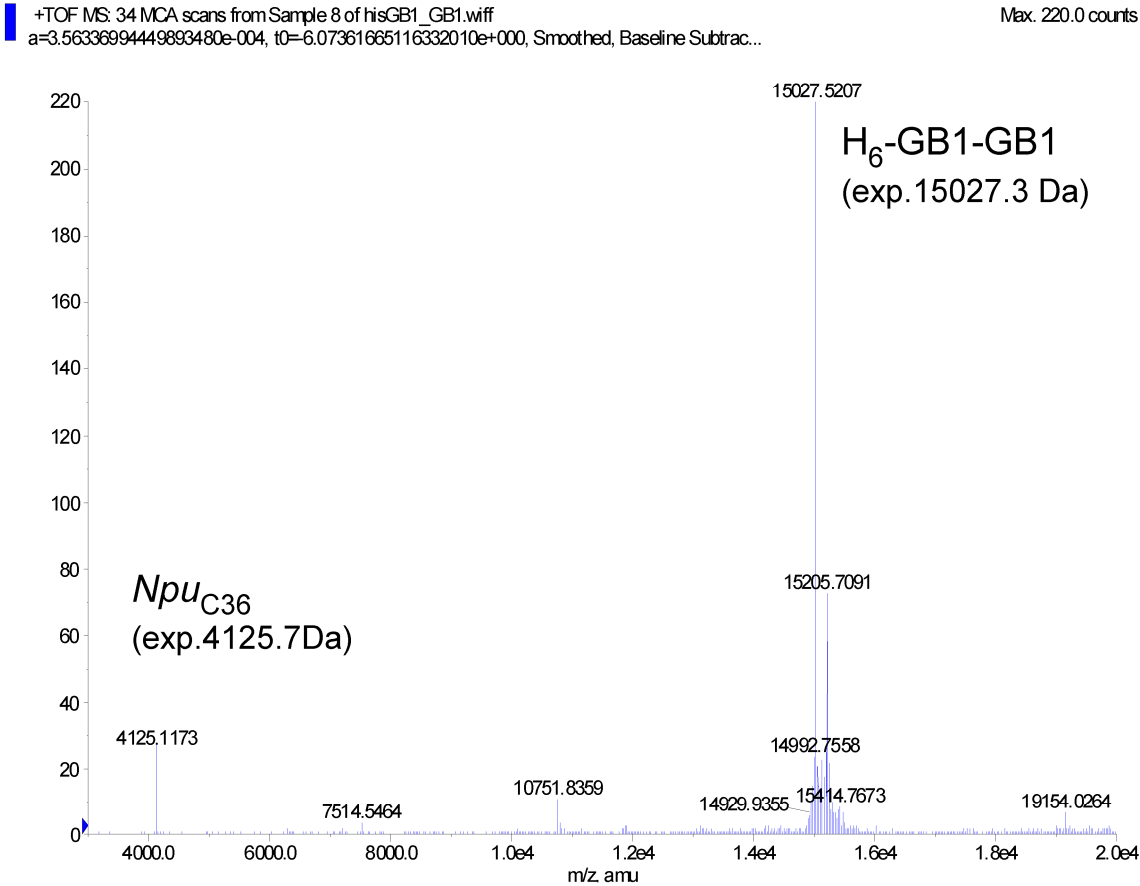

Supplement: pone.0005185.s004.pdf [file pone.0005185.s004.pdf]
