# Supplementary material for: In Vivo and In Vitro Protein Ligation by Naturally Occurring and Engineered Split DnaE Inteins
Source: PubMed Central journal article supplement (PMC2664965; doi:10.1371/journal.pone.0005185), 2009-04-13
Supplement: pone.0005185.s005.pdf [file pone.0005185.s005.pdf]

## Supplementary Figure 4

The mass spectra of the ligated and cleaved products from the ligation of nSH3 and GB1 by *Npu*DnaE intein.

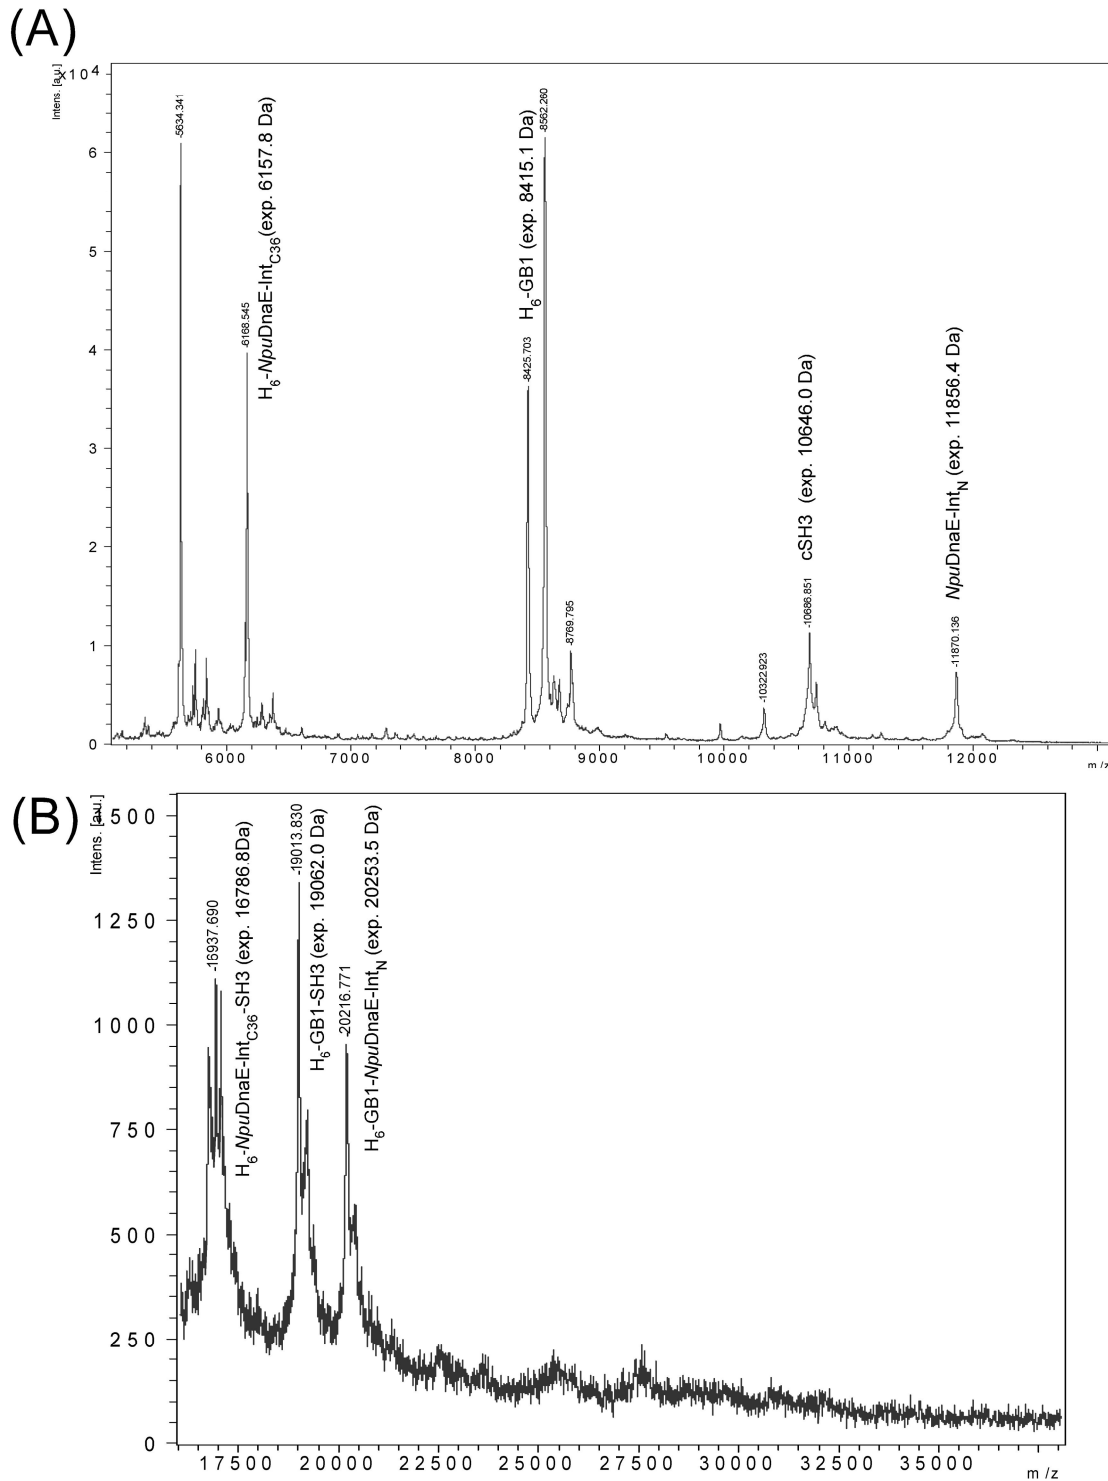

Supplemental Fig.3
